# Supplementary material
Source: PubMed Central journal article supplement (PMC5044815)
Supplement: JVI.00674-16_zjv999181991so1.pdf [file JVI.00674-16_zjv999181991so1.pdf]

**Supplemental Table 1. Antiretroviral Histories.**

| ID          | Visit <sup>1</sup> | ARVExp <sup>2</sup>         | ID          | Visit       | ARVExp              | ID          | Visit       | ARVExp      |
|-------------|--------------------|-----------------------------|-------------|-------------|---------------------|-------------|-------------|-------------|
| <b>1010</b> | 0                  | ddC,3TC,ZDV,IDV,d4T         | <b>4124</b> | 0           | NFV,3TC,ZDV,EFV,CBV | <b>4179</b> | 0           | RTV,DAR,TRU |
|             | 11                 | RTV,SQV,CBV,NVP             |             | 3           | EFV,CBV             |             | 3           | RTV,DAR,TRU |
|             | 38                 | TFV,RTV,3TC                 |             | 5           | EFV,CBV             |             | 5           | RTV,DAR,TRU |
|             | 44                 | TFV,3TC,KTA                 |             | 10          | EFV,CBV             |             | 6           | RTV,DAR,TRU |
|             | 50                 | TFV,3TC,KTA                 |             | 12          | EFV,CBV             |             | 6           | Death       |
|             | 62                 | NONE                        |             | 13          | EFV,CBV             |             | <b>5025</b> | 0           |
|             | 66                 | TFV,RTV,3TC,ATV             |             | 16          | EFV,CBV             | 4           |             | TFV,3TC,KTA |
|             | 72                 | Death                       |             | 17          | EFV,CBV             | 5           |             | TFV,3TC,KTA |
| <b>2004</b> | 0                  | 3TC,NVP,IDV,ddI,NFV,ddC,ZDV | 18          | Death       | 6                   | TFV,3TC,KTA |             |             |
|             | 7                  | 3TC,NVP,IDV                 | <b>4129</b> | 0           | RTV,CBV,NVP,ATV,TRU | 7           | TFV,3TC,KTA |             |
|             | 38                 | TFV,3TC,NVP                 |             | 6           | TFV,CBV,RGV         | 8           | TFV,3TC,KTA |             |
|             | 53                 | TFV,RTV,3TC,KTA,NVP         |             | 14          | TFV,3TC,CBV,RGV     | 9           | TFV,3TC,KTA |             |
|             | 67                 | TFV,3TC,NVP                 |             | 23          | TFV,CBV,RGV         | 10          | TFV,3TC,KTA |             |
|             | 83                 | ABC,3TC,NVP                 |             | 29          | TFV,CBV,RGV         | 12          | TFV,3TC,KTA |             |
|             | 83                 | Death                       |             | 36          | TRU,RGV             | 13          | TFV,3TC,KTA |             |
|             | <b>4013</b>        | 0                           |             | NFV,3TC,ZDV | 38                  | Death       | 14          | TFV,3TC,KTA |
| 1           |                    | NFV,3TC,ZDV,CBV             |             | <b>4143</b> | 0                   | ABC,CBV,TRU | 15          | 3TC,KTA     |
| 6           |                    | NFV,3TC,CBV,d4T             | 0           |             | KTA,TRU             | 15          | TFV,3TC,KTA |             |
| 13          |                    | NFV,3TC,FTV,IDV,d4T         | 4           |             | KTA,TRU             | 28          | Death       |             |
| 18          |                    | 3TC,FTV,d4T                 | 4           |             | KTA,TRU             | <b>4130</b> | 0           | NVP,TRU     |
| 25          |                    | 3TC,FTV,d4T                 | 5           |             | RTV,DAR,RGV,TMC     |             | 2           | NVP,TRU     |
| 27          |                    | 3TC,FTV,d4T                 | 6           |             | Death               |             | 12          | 3TC,CBV,d4T |
| 32          |                    | 3TC,FTV,d4T                 | <b>4150</b> | 0           | 3TC,ZDV,IDV         |             | 12          | NVP,TRU     |
| 39          |                    | 3TC,FTV,d4T                 |             | 52          | KTA,CBV             | 17          | NVP,TRU     |             |
| 50          |                    | 3TC,FTV,d4T                 |             | 126         | ATR                 | 21          | NVP,TRU     |             |
| 50          |                    | Death                       |             | 128         | RTV,ATV,TRU         | 24          | NVP,TRU     |             |
| <b>4106</b> |                    | 0                           | ZDV         | 133         | RTV,ATV,EPZ         | 29          | Death       |             |
|             |                    | 1                           | ZDV         | 136         | ATV,EPZ             | <b>6015</b> | 0           | ZDV         |
|             |                    | 40                          | ZDV         | 145         | RTV,DAR,EPZ         |             | 13          | 3TC,NVP,d4T |
|             | 61                 | ZDV                         | 146         | RTV,DAR,EPZ | 14                  |             | ddI,NVP,d4T |             |
|             | 68                 | 3TC,ZDV                     | 146         | Death       | 46                  |             | ddI,d4T     |             |
|             | 72                 | 3TC,ZDV                     | <b>4154</b> | 0           | RTV,ATV,FPV,EPZ,RGV |             | 46          | ddI,NVP,d4T |

|             |                 |                 |              |             |                     |                 |                 |
|-------------|-----------------|-----------------|--------------|-------------|---------------------|-----------------|-----------------|
| 80          | NFV,3TC,ZDV,IDV | 0               | Death        | 48          | ddl,RTV,SQV,NVP,d4T |                 |                 |
| 91          | 3TC,ZDV         | <b>4175</b>     | 0            | ATR         | 50                  | Death           |                 |
| 192         | ABC,RTV,3TC,ATV | 6               | ATR          | <b>6083</b> | 0                   | EFV,CBV         |                 |
| 203         | ABC,RTV,3TC,ATV | 6               | ATR          | 6           | CBV,NVP             |                 |                 |
| 205         | ABC,RTV,3TC,ATV | 7               | ATR          | 9           | CBV,NVP             |                 |                 |
| 207         | ABC,RTV,3TC,ATV | 7               | ATR          | 13          | ABC,TFV,KTA,CBV,NVP |                 |                 |
| 210         | ABC,RTV,3TC,ATV | 8               | ATV,TRU,ATR  | 21          | KTA,CBV,NVP,TZV     |                 |                 |
| 212         | ABC,RTV,3TC,ATV | 8               | RTV2,ATV,TRU | 25          | TFV,3TC,NVP         |                 |                 |
| 214         | ABC,RTV,3TC,ATV | 8               | NFV,ATV,TRU  | 31          | TFV,3TC,NVP         |                 |                 |
| 215         | Death           | 8               | Death        | 38          | TFV,NVP,ETC         |                 |                 |
| <b>5095</b> | 0               | KTA,TRU         | <b>5024</b>  | 0           | TFV,3TC,EFV         |                 |                 |
| 3           | NONE            | 9               | TFV,ddl,KTA  | 47          | TFV,NVP,TRU,ETC     |                 |                 |
| 9           | KTA,TRU         | 23              | KTA,TRU      | 50          | NVP,TRU             |                 |                 |
| 10          | KTA,TRU         | 24              | NONE         | 51          | Death               |                 |                 |
| 21          | KTA,TRU         | 41              | KTA,TRU      | <b>1156</b> | 0                   | 3TC,FTV,CBV,d4T |                 |
| 21          | Death           | 44              | KTA,TRU      | 0           | Death               |                 |                 |
| <b>4149</b> | 0               | RTV,DAR,RGV,TMC | 67           | RTV,DAR,TRU | <b>4010</b>         | 0               | 3TC,ZDV,FTV,d4T |
| 0           | Death           | 69              | Death        | 0           | 3TC,ZDV,SQV         |                 |                 |
|             |                 |                 |              | 2           | 3TC,ZDV,FTV         |                 |                 |
|             |                 |                 |              | 15          | 3TC,ZDV,FTV         |                 |                 |
|             |                 |                 |              | 19          | Death               |                 |                 |

1. Month since first available ARV.
